# Supplementary material for: Non-alcoholic fatty liver disease is associated with increased risk of chronic kidney disease
Source: PubMed Central journal article supplement — Ther Adv Chronic Dis. 2021 Jun 23;12:20406223211024361. doi: 10.1177/20406223211024361 (PMC8237225; doi:10.1177/20406223211024361), 2021-06-23
Supplement: sj-pdf-1-taj-10.1177_20406223211024361.pdf [file sj-pdf-1-taj-10.1177_20406223211024361.pdf]

## Supplementary file 1. Literature search strategy for Pubmed

---

- #1** "Non-alcoholic Fatty Liver Disease "[Mesh]
  - #2** ((((((Non-alcoholic Fatty Liver Disease[Text Word]) OR Non-alcoholic steato-hepatitis[Text Word]) OR  
NAFLD[Text Word]) OR NASH[Text Word]) OR steatohepatitis[Text Word]) OR steatosis[Text Word])  
OR fatty liver[Text Word]) OR Liver fat[Text Word]
  - #3** #1 OR #2
  - #4** ("Renal Insufficiency, Chronic"[Mesh]) OR "Kidney Failure, Chronic"[Mesh]
  - #5** (((((chronic kidney disease[Text Word]) OR chronic kidney failure[Text Word]) OR chronic renal  
insufficiency[Text Word]) OR chronic renal dysfunction[Text Word]) OR end-stage kidney disease[Text  
Word]) OR end-stage renal disease[Text Word]
  - #6** #4 OR #5
  - #7** #3 AND #6
  - #8** animals[MeSH Terms]
  - #9** humans[MeSH Terms]
  - #10** #8 NOT #9
  - #11** #7 NOT #10
-

## Supplemental file 2. Confounders adjusted in the included studies

| Study            | Maximal confounders adjusted                                                                                                                                                                                                                                                                                             | Adequate adjustment† |
|------------------|--------------------------------------------------------------------------------------------------------------------------------------------------------------------------------------------------------------------------------------------------------------------------------------------------------------------------|----------------------|
| Kaps 2020        | Age, sex, index year, physician, diabetes, hypertension, obesity, ischemic heart diseases, glomerular diseases, and renal tubulo-interstitial diseases                                                                                                                                                                   | No                   |
| Krahn 2020       | Age, sex, ethnicity, DM, nucleoside reverse transcriptase inhibitors                                                                                                                                                                                                                                                     | No                   |
| Wilechansky 2019 | Age, sex, smoking, drinks, SBP, DBP, use of antihypertensive medications, HDL, TC, aspirin use and DM, BMI.                                                                                                                                                                                                              | Yes                  |
| Park 2019        | Age, sex, DM, hypertension, obesity, hyperlipidemia, CAD, peripheral vascular disease, cerebrovascular disease, heart failure and chronic obstructive pulmonary disease, angiotensin-converting-enzyme inhibitors and angiotensin II receptor blockers, cirrhosis, decompensated cirrhosis and hepatocellular carcinoma. | Yes                  |
| Sinn 2017        | Age, sex, year of visit, smoking, alcohol, BMI and baseline eGFR, SBP, HbA1c, LDL-C, use of antihypertensive medications, antidiabetic medications, and lipid lowering medications, time-varying development of DM and hypertension                                                                                      | Yes                  |
| Huh 2017         | Age, sex, smoking, alcohol, baseline eGFR, regular exercise, protein intake, SBP, DM, TC and hsCRP.                                                                                                                                                                                                                      | Yes                  |
| Shen 2017        | Age, sex, smoking, BMI, SBP, TG, FPG, HLD-C, hemoglobin, platelet, history of hypertension, DM, and CAD, metabolic syndrome, sleep quality                                                                                                                                                                               | Yes                  |
| Targher 2014     | Age, sex, duration of DM, hemoglobin A1C, hypertension, and baseline eGFR, excluding those with microalbuminuria at baseline                                                                                                                                                                                             | Yes                  |
| Jenks 2014       | Age, sex, BMI, duration of DM, HbA1c and SBP                                                                                                                                                                                                                                                                             | No                   |
| Chang 2008       | Age, eGFR, TG, and HDL-C                                                                                                                                                                                                                                                                                                 | No                   |
| Targher 2008     | Age, sex, BMI, waist circumference, SBP, DM duration, HbA1c, baseline eGFR, microalbuminuria, LDL-C, TG, smoking history, and current use of medications.                                                                                                                                                                | Yes                  |

†Adequate adjustment denoted adjustment of at least six of eight confounders including sex, age, smoking, hypertension or blood pressure or antihypertensive treatment, BMI or other measure of overweight/obesity, cholesterol, blood glucose or diabetes and baseline eGFR

BMI: body mass index; CAD: coronary artery disease; DBP: diastolic blood pressure; DM: diabetes mellitus; eGFR, estimated glomerular filtration rate; FPG: fasting plasma glucose; HbA1c: hemoglobin A1c; HDL-C: high-density lipoprotein cholesterol; HF: heart failure; LDL-C: low-density lipoprotein cholesterol; NA: not available; SBP: systolic blood pressure; TC: total cholesterol; TG: triglycerides

### Supplementary file 3. Quality assessment of the included studies

| Study            | Selection<br>(points) | Comparability<br>(points) | Outcome<br>(points) | Quality<br>(total points)* |
|------------------|-----------------------|---------------------------|---------------------|----------------------------|
| Kaps 2020        | 2                     | 2                         | 3                   | 7                          |
| Krahn 2020       | 2                     | 2                         | 2                   | 6                          |
| Wilechansky 2019 | 4                     | 2                         | 3                   | 9                          |
| Park 2019        | 3                     | 2                         | 3                   | 8                          |
| Sinn 2017        | 3                     | 2                         | 2                   | 7                          |
| Huh 2017         | 4                     | 2                         | 3                   | 9                          |
| Shen 2017        | 3                     | 2                         | 3                   | 8                          |
| Targher 2014     | 3                     | 2                         | 3                   | 8                          |
| Jenks 2014       | 2                     | 2                         | 2                   | 6                          |
| Chang 2008       | 2                     | 2                         | 2                   | 6                          |
| Targher 2008     | 3                     | 2                         | 3                   | 8                          |

\* Included studies were graded in quality as good if awarded with  $\geq 7$  points or fair if 4-6 points.

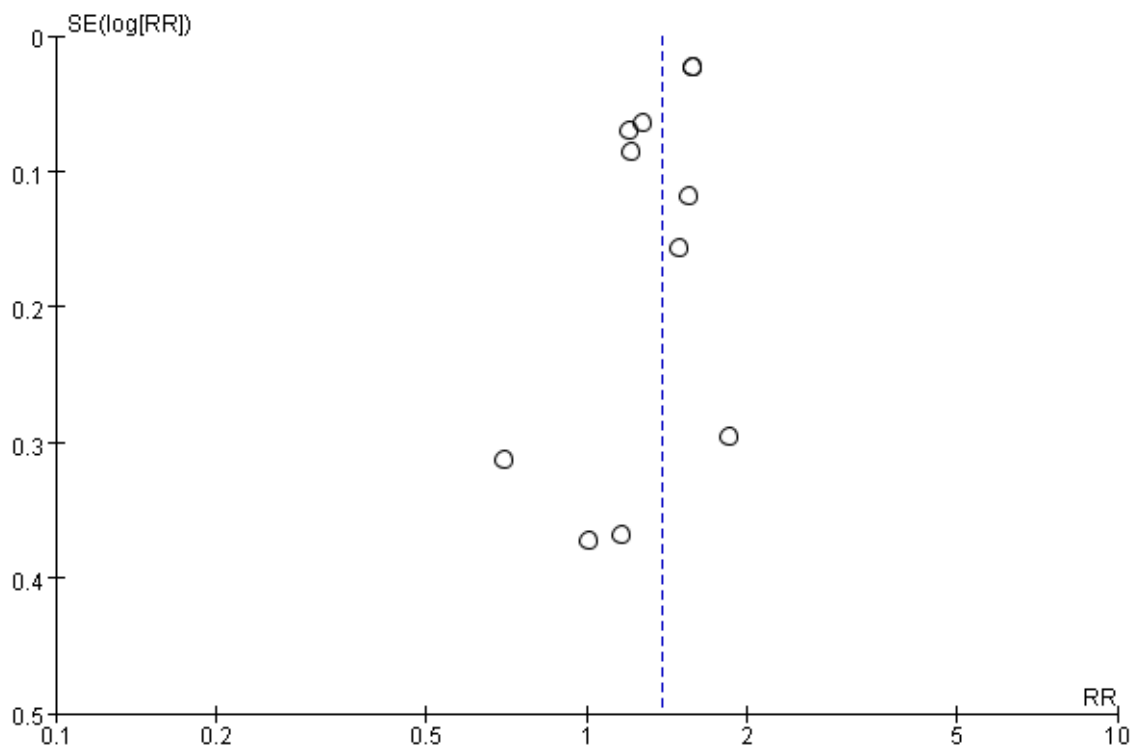

**Supplementary file 4. Funnel plot of chronic kidney disease associated with NAFLD.**

NAFLD: nonalcoholic fatty liver disease

**Supplementary file 5. Absolute risk of chronic kidney disease in included studies**

| <b>Study</b>     | <b>Event Rate* (non-NAFLD)</b> | <b>Event Rate* (NAFLD)</b> |
|------------------|--------------------------------|----------------------------|
| Kaps 2020        | 11.6                           | 17.1                       |
| Krahn 2020       | 26.2                           | 28.2                       |
| Wilechansky 2019 | 11.3                           | 12.3                       |
| Park 2019        | 5.5                            | 8.2                        |
| Sinn 2017        | 2.8                            | 4.7                        |
| Huh 2017         | 13.1                           | 18.4                       |
| Shen 2017        | 39.7                           | 71.1                       |
| Targher 2014     | 21.4                           | 70.5                       |
| Jenks 2014       | 52.7                           | 54.6                       |
| Chang 2008       | 11.3                           | 24.7                       |
| Targher 2008     | 18.9                           | 58.3                       |
| <b>Median</b>    | 13.1                           | 24.7                       |

\* Per 1,000 patient-years.

NAFLD: nonalcoholic fatty liver disease

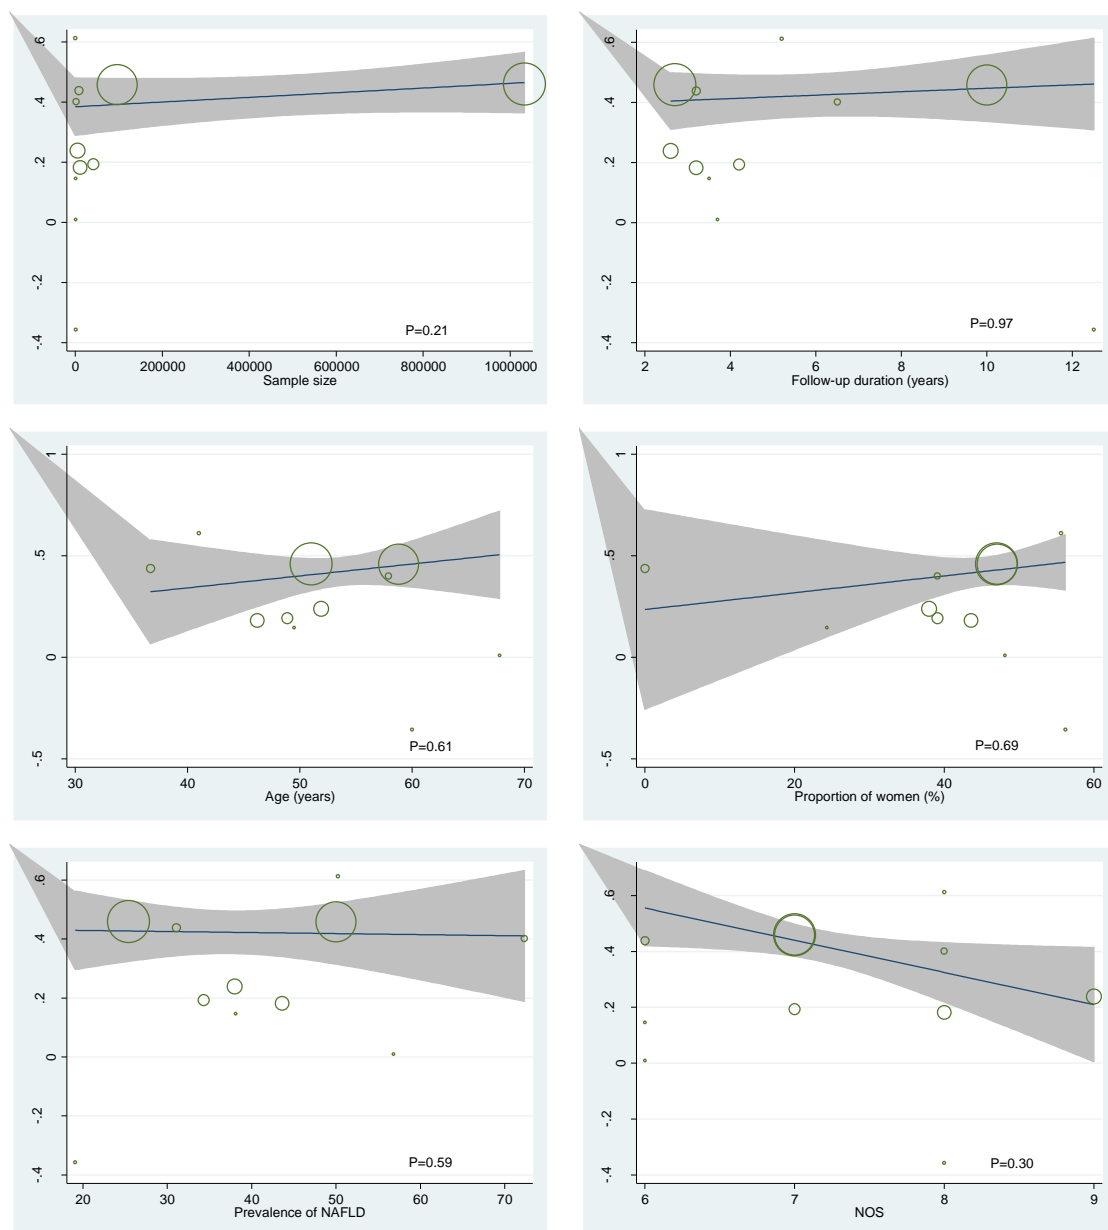

## Supplementary File 6. Study characteristics and the risk of CKD associated with

### NAFLD

NAFLD: nonalcoholic fatty liver disease
